# Supplementary material for: Efficacy and Safety of Add-on Mirogabalin to NSAIDs in Lumbar Spinal Stenosis with Peripheral Neuropathic Pain: A Randomized, Open-Label Study
Source: Springer Nature journal article supplement (doi:10.1007/s40122-022-00410-z), 2022-07-20
Supplement: MOESM1 [file 23287666]

## Supplementary Materials

### **Efficacy and Safety of Add-on Mirogabalin to NSAIDs in Lumbar Spinal Stenosis with Peripheral Neuropathic Pain: A Randomized, Open-label Study**

#### **Authors**

Takuya Nikaido · Hiroshi Takatsuna · Shunsuke Tabata · Kazuhito Shiosakai · Taichi Nakatani · Shin-ichi Konno

#### **Affiliations**

Takuya Nikaido\* · Shin-ichi Konno

Department of Orthopaedic Surgery, Fukushima Medical University School of Medicine, 1 Hikarigaoka, Fukushima 960-1295, Japan

Hiroshi Takatsuna · Shunsuke Tabata

Primary Medical Science Department, Medical Affairs Division, Daiichi Sankyo Co., Ltd, 3-5-1, Nihonbashi Honcho, Chuo-ku, Tokyo 103-8426, Japan

Kazuhito Shiosakai

Data Intelligence Department, Digital Transformation Management Division, Daiichi Sankyo Co., Ltd. 1-2-58, Hiromachi, Shinagawa-ku, Tokyo 140-8710, Japan

Taichi Nakatani

DS Department 2, Data Solution Center, Clinical Business Operation Headquarters, EP-CRSU Co., Ltd. 6-29, Shin-ogawamachi, Shinjuku-ku, Tokyo 162-0814, Japan

#### ***\*Corresponding author***

Takuya Nikaido

Department of Orthopaedic Surgery, Fukushima Medical University School of Medicine, 1 Hikarigaoka, Fukushima 960-1295, Japan

Tel: +81 24-547-1276

Fax: +81 24-548-5505

E-mail: [tnikaido@fmu.ac.jp](mailto:tnikaido@fmu.ac.jp)

## Supplementary Materials

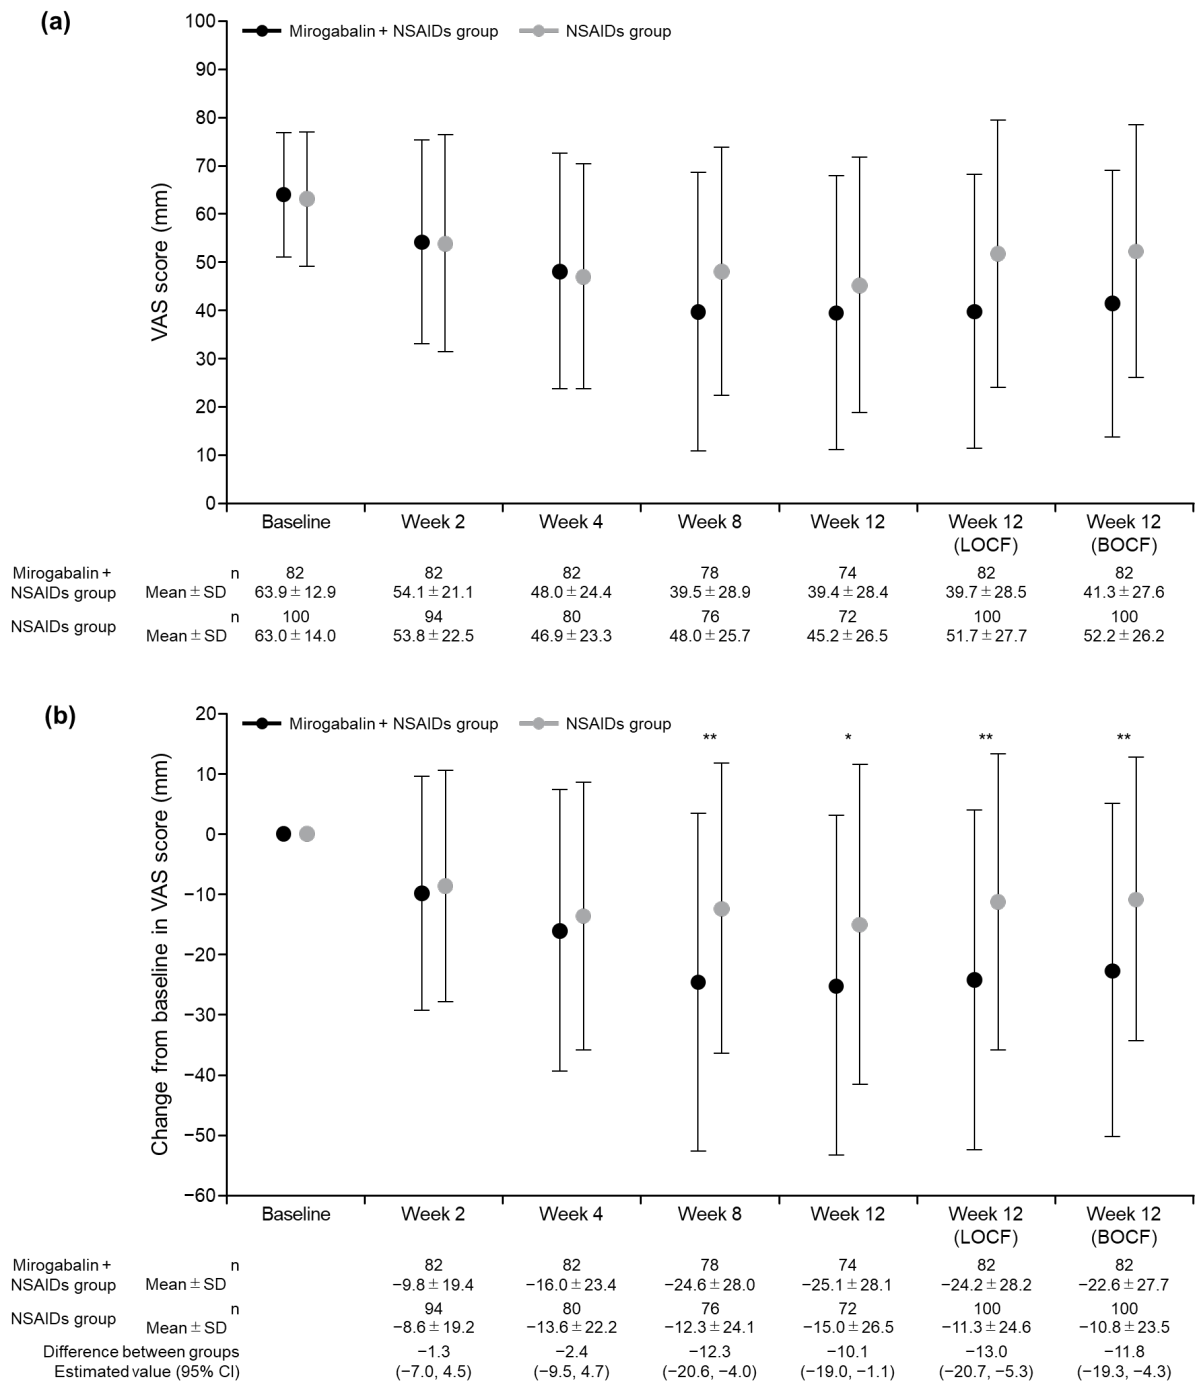

**Figure S1.** (a) VAS score for leg pain and (b) its change from baseline in compliant subgroups (mITT population)

Data are mean ± SD.

No statistical tests were conducted for the results shown in Figure S1a.

\* $P < 0.05$  for between-group differences by  $t$ -test

**\*\* $P < 0.01$**  for between-group differences by *t*-test

*BOCF* baseline observation carried forward, *CI* confidence interval, *LOCF* last observation carried forward, *mITT* modified intention-to-treat, *NSAIDs* non-steroidal anti-inflammatory drugs, *SD* standard deviation, *VAS* visual analog scale

**Table S1.** Baseline patient demographic and clinical characteristics in patients who were compliant with the package insert (modified intention-to-treat population)

| Characteristics                           | Compliant                                  |                             |
|-------------------------------------------|--------------------------------------------|-----------------------------|
|                                           | Mirogabalin and NSAIDs<br>( <i>n</i> = 82) | NSAIDs<br>( <i>n</i> = 100) |
| Age, years                                | 68.3 ± 11.2                                | 71.0 ± 9.2                  |
| ≥ 65                                      | 55 (67.1)                                  | 75 (75.0)                   |
| Sex                                       |                                            |                             |
| Male                                      | 38 (46.3)                                  | 53 (53.0)                   |
| Female                                    | 44 (53.7)                                  | 47 (47.0)                   |
| Body weight, kg                           | 63.5 ± 14.5                                | 62.2 ± 13.0                 |
| < 60                                      | 33 (40.2)                                  | 39 (39.0)                   |
| VAS score at enrollment, mm               | 63.9 ± 12.9                                | 63.0 ± 14.0                 |
| < 60                                      | 38 (46.3)                                  | 47 (47.0)                   |
| ≥ 60                                      | 44 (53.7)                                  | 53 (53.0)                   |
| CrCL at enrollment, mL/min                | 80.9 ± 36.1                                | 70.4 ± 23.0                 |
| ≥ 60                                      | 58 (70.7)                                  | 66 (66.0)                   |
| 30 to < 60                                | 24 (29.3)                                  | 34 (34.0)                   |
| Duration of radicular type of LSS, months | 24.6 ± 33.3                                | 25.7 ± 36.3                 |
| Median (Q1, Q3)                           | 9.0 (4.0, 30.0)                            | 11.0 (5.0, 29.5)            |
| ≥ 6                                       | 54 (65.9)                                  | 67 (67.0)                   |
| Duration of limb pain, months             | 30.2 ± 35.9                                | 26.5 ± 37.2                 |
| Median (Q1, Q3)                           | 12.5 (6.0, 46.0)                           | 12.5 (5.0, 30.5)            |
| Symptoms of radicular type of LSS         |                                            |                             |
| Pain                                      | 16 (19.5)                                  | 21 (21.0)                   |
| Numbness                                  | 0 (0.0)                                    | 0 (0.0)                     |
| Pain and numbness                         | 66 (80.5)                                  | 79 (79.0)                   |

Data are mean ± SD or *n* (%).

CrCL creatinine clearance, LSS lumbar spinal stenosis, NSAIDs non-steroidal anti-inflammatory drugs, VAS visual analog scale

**Table S2.** Daily dose of mirogabalin for 12 weeks by renal function at enrollment (mITT population, *N* = 110)

| Mirogabalin dose | CrCL ≥ 60 mL/min             |                            |                            |                            |                             | CrCL 30 to < 60 mL/min       |                            |                            |                            |                             |
|------------------|------------------------------|----------------------------|----------------------------|----------------------------|-----------------------------|------------------------------|----------------------------|----------------------------|----------------------------|-----------------------------|
|                  | Baseline<br>( <i>n</i> = 80) | Week 2<br>( <i>n</i> = 78) | Week 4<br>( <i>n</i> = 75) | Week 8<br>( <i>n</i> = 66) | Week 12<br>( <i>n</i> = 62) | Baseline<br>( <i>n</i> = 30) | Week 2<br>( <i>n</i> = 30) | Week 4<br>( <i>n</i> = 28) | Week 8<br>( <i>n</i> = 26) | Week 12<br>( <i>n</i> = 23) |
| 2.5 mg BID       | 0<br>(0.0)                   | 1<br>(1.3)                 | 1<br>(1.3)                 | 2<br>(3.0)                 | 2<br>(3.2)                  | 30<br>(100.0)                | 1<br>(3.3)                 | 2<br>(7.1)                 | 2<br>(7.7)                 | 2<br>(8.7)                  |
| 5 mg BID         | 80<br>(100.0)                | 7<br>(9.0)                 | 9<br>(12.0)                | 6<br>(9.1)                 | 5<br>(8.1)                  | 0<br>(0.0)                   | 29<br>(96.7)               | 7<br>(25.0)                | 6<br>(23.1)                | 5<br>(21.7)                 |
| 7.5 mg BID       | 0<br>(0.0)                   | 0<br>(0.0)                 | 1<br>(1.3)                 | 1<br>(1.5)                 | 0<br>(0.0)                  | 0<br>(0.0)                   | 0<br>(0.0)                 | 18<br>(64.3)               | 17<br>(65.4)               | 15<br>(65.2)                |
| 10 mg BID        | 0<br>(0.0)                   | 69<br>(88.5)               | 12<br>(16.0)               | 10<br>(15.2)               | 9<br>(14.5)                 | 0<br>(0.0)                   | 0<br>(0.0)                 | 1<br>(3.6)                 | 1<br>(3.8)                 | 1<br>(4.3)                  |
| 15 mg BID        | 0<br>(0.0)                   | 0<br>(0.0)                 | 50<br>(66.7)               | 45<br>(68.2)               | 44<br>(71.0)                | 0<br>(0.0)                   | 0<br>(0.0)                 | 0<br>(0.0)                 | 0<br>(0.0)                 | 0<br>(0.0)                  |
| Other            | 0<br>(0.0)                   | 1<br>(1.3)                 | 2<br>(2.7)                 | 2<br>(3.0)                 | 2<br>(3.2)                  | 0<br>(0.0)                   | 0<br>(0.0)                 | 0<br>(0.0)                 | 0<br>(0.0)                 | 0<br>(0.0)                  |

Data are *n* (%).

*BID* twice daily, *CrCL* creatinine clearance, *mITT* modified intention-to-treat

**Table S3.** Change in VAS score from baseline to Week 12 among patients who were compliant with the package insert, baseline VAS, renal function, type of LSS symptoms, SPDQ score, and SF-SPDQ score by MMRM analysis (mITT population)

|                                               |                 | <b>Mirogabalin and<br/>NSAIDs</b> | <b>NSAIDs</b>         | <b>Difference between<br/>groups</b> |
|-----------------------------------------------|-----------------|-----------------------------------|-----------------------|--------------------------------------|
| <b>Compliance with the<br/>package insert</b> |                 |                                   |                       |                                      |
| Compliant                                     | <i>n</i>        | 74                                | 72                    |                                      |
|                                               | LS mean ± SE    | -24.2 ± 3.1                       | -14.0 ± 3.1           | -10.2 ± 4.4                          |
|                                               | 95% CI          | -30.3, -18.1                      | -20.2, -7.9           | -18.8, -1.5                          |
|                                               | <i>P</i> -value | < 0.0001 <sup>a</sup>             | < 0.0001 <sup>a</sup> | 0.0212 <sup>b</sup>                  |
| <b>VAS at baseline</b>                        |                 |                                   |                       |                                      |
| VAS score < 60 mm                             | <i>n</i>        | 40                                | 39                    |                                      |
|                                               | LS mean ± SE    | -20.3 ± 3.5                       | -9.5 ± 3.6            | -10.7 ± 5.0                          |
|                                               | 95% CI          | -27.2, -13.3                      | -16.7, -2.4           | -20.7, -0.7                          |
|                                               | <i>P</i> -value | < 0.0001 <sup>a</sup>             | 0.0096 <sup>a</sup>   | 0.0355 <sup>b</sup>                  |
| VAS score ≥ 60 mm                             | <i>n</i>        | 45                                | 36                    |                                      |
|                                               | LS mean ± SE    | -27.3 ± 4.3                       | -19.2 ± 4.9           | -8.1 ± 6.5                           |
|                                               | 95% CI          | -35.8, -18.7                      | -29.0, -9.5           | -21.0, 4.9                           |
|                                               | <i>P</i> -value | < 0.0001 <sup>a</sup>             | 0.0002 <sup>a</sup>   | 0.2205 <sup>b</sup>                  |
| <b>Renal function</b>                         |                 |                                   |                       |                                      |
| CrCL ≥ 60 mL/min                              | <i>n</i>        | 62                                | 53                    |                                      |

|                             |                 |                       |                       |                     |
|-----------------------------|-----------------|-----------------------|-----------------------|---------------------|
|                             | LS mean ± SE    | -27.1 ± 3.2           | -16.4 ± 3.5           | -10.7 ± 4.7         |
|                             | 95% CI          | -33.3, -20.8          | -23.2, -9.5           | -20.0, -1.4         |
|                             | <i>P</i> -value | < 0.0001 <sup>a</sup> | < 0.0001 <sup>a</sup> | 0.0241 <sup>b</sup> |
| CrCL 30 to < 60 mL/min      | <i>n</i>        | 23                    | 22                    |                     |
|                             | LS mean ± SE    | -16.1 ± 5.7           | -9.8 ± 5.9            | -6.3 ± 8.2          |
|                             | 95% CI          | -27.5, -4.6           | -21.7, 2.2            | -22.9, 10.3         |
|                             | <i>P</i> -value | 0.0071 <sup>a</sup>   | 0.1065 <sup>a</sup>   | 0.4470 <sup>b</sup> |
| <b>Type of LSS symptoms</b> |                 |                       |                       |                     |
| Pain                        | <i>n</i>        | 18                    | 21                    |                     |
|                             | LS mean ± SE    | -24.7 ± 6.0           | -16.1 ± 5.6           | -8.6 ± 8.2          |
|                             | 95% CI          | -36.9, -12.5          | -27.5, -4.8           | -25.2, 8.1          |
|                             | <i>P</i> -value | 0.0002 <sup>a</sup>   | 0.0067 <sup>a</sup>   | 0.3024 <sup>b</sup> |
| Pain and numbness           | <i>n</i>        | 67                    | 54                    |                     |
|                             | LS mean ± SE    | -23.9 ± 3.2           | -13.3 ± 3.6           | -10.6 ± 4.8         |
|                             | 95% CI          | -30.2, -17.6          | -20.5, -6.2           | -20.1, -1.1         |
|                             | <i>P</i> -value | < 0.0001 <sup>a</sup> | 0.0003 <sup>a</sup>   | 0.0296 <sup>b</sup> |
| <b>SPDQ</b>                 |                 |                       |                       |                     |
| Total score < 0             | <i>n</i>        | 16                    | 13                    |                     |
|                             | LS mean ± SE    | -20.2 ± 7.0           | -9.0 ± 7.7            | -11.2 ± 10.4        |

|                 |                 |                       |                       |                     |
|-----------------|-----------------|-----------------------|-----------------------|---------------------|
|                 | 95% CI          | -34.4, -6.0           | -24.8, 6.8            | -32.4, 10.1         |
|                 | <i>P</i> -value | 0.0069 <sup>a</sup>   | 0.2520 <sup>a</sup>   | 0.2924 <sup>b</sup> |
| Total score ≥ 0 | <i>n</i>        | 68                    | 62                    |                     |
|                 | LS mean ± SE    | -25.3 ± 3.1           | -15.3 ± 3.3           | -9.9 ± 4.6          |
|                 | 95% CI          | -31.4, -19.1          | -21.9, -8.8           | -19.0, -0.9         |
|                 | <i>P</i> -value | < 0.0001 <sup>a</sup> | < 0.0001 <sup>a</sup> | 0.0309 <sup>b</sup> |
| <b>SF-SPDQ</b>  |                 |                       |                       |                     |
| Score < 0       | <i>n</i>        | 10                    | 10                    |                     |
|                 | LS mean ± SE    | -15.5 ± 9.2           | -15.3 ± 9.4           | -0.1 ± 13.2         |
|                 | 95% CI          | -34.7, 3.7            | -35.0, 4.3            | -27.7, 27.4         |
|                 | <i>P</i> -value | 0.1086 <sup>a</sup>   | 0.1186 <sup>a</sup>   | 0.9927 <sup>b</sup> |
| Score ≥ 0       | <i>n</i>        | 74                    | 65                    |                     |
|                 | LS mean ± SE    | -25.3 ± 3.0           | -14.1 ± 3.2           | -11.2 ± 4.4         |
|                 | 95% CI          | -31.2, -19.4          | -20.4, -7.7           | -19.9, -2.6         |
|                 | <i>P</i> -value | < 0.0001 <sup>a</sup> | < 0.0001 <sup>a</sup> | 0.0112 <sup>b</sup> |

<sup>a</sup>*P*-value for Week 12 vs baseline.

<sup>b</sup>*P*-value for mirogabalin and NSAIDs group vs NSAIDs group.

*CI* confidence interval, *CrCL* creatinine clearance, *LS* least squares, *LSS* lumbar spinal stenosis, *mITT* modified intention-to-treat, *MMRM* mixed model for repeated measure model, *NSAIDs* non-steroidal anti-inflammatory drugs, *SE* standard error, *SPDQ* spine pain DETECT questionnaire, *SF-SPDQ* short form SPDQ, *VAS* visual analog scale



**Table S4.** Each item of EQ-5D-5L five-dimensional descriptive system at baseline and Week 12 (mITT population)

|                  |                   | <b>Mirogabalin and NSAIDs (<i>n</i> = 85)</b> |                | <b>NSAIDs (<i>n</i> = 75)</b> |                |
|------------------|-------------------|-----------------------------------------------|----------------|-------------------------------|----------------|
|                  |                   | <b>Baseline</b>                               | <b>Week 12</b> | <b>Baseline</b>               | <b>Week 12</b> |
| Mobility         | No problems       | 11 (12.9)                                     | 21 (24.7)      | 20 (26.7)                     | 25 (33.3)      |
|                  | Slight problems   | 25 (29.4)                                     | 36 (42.4)      | 20 (26.7)                     | 29 (38.7)      |
|                  | Moderate problems | 26 (30.6)                                     | 20 (23.5)      | 23 (30.7)                     | 14 (18.7)      |
|                  | Severe problems   | 22 (25.9)                                     | 7 (8.2)        | 12 (16.0)                     | 7 (9.3)        |
|                  | Extreme problems  | 1 (1.2)                                       | 1 (1.2)        | 0 (0.0)                       | 0 (0.0)        |
|                  | Unknown           | 0 (0.0)                                       | 0 (0.0)        | 0 (0.0)                       | 0 (0.0)        |
| Self-care        | No problems       | 60 (70.6)                                     | 71 (83.5)      | 54 (72.0)                     | 58 (77.3)      |
|                  | Slight problems   | 17 (20.0)                                     | 11 (12.9)      | 16 (21.3)                     | 13 (17.3)      |
|                  | Moderate problems | 5 (5.9)                                       | 2 (2.4)        | 4 (5.3)                       | 3 (4.0)        |
|                  | Severe problems   | 3 (3.5)                                       | 1 (1.2)        | 1 (1.3)                       | 1 (1.3)        |
|                  | Extreme problems  | 0 (0.0)                                       | 0 (0.0)        | 0 (0.0)                       | 0 (0.0)        |
|                  | Unknown           | 0 (0.0)                                       | 0 (0.0)        | 0 (0.0)                       | 0 (0.0)        |
| Usual activities | No problems       | 22 (25.9)                                     | 33 (38.8)      | 26 (34.7)                     | 35 (46.7)      |

|                    |                   |           |           |           |           |
|--------------------|-------------------|-----------|-----------|-----------|-----------|
|                    | Slight problems   | 32 (37.6) | 31 (36.5) | 29 (38.7) | 24 (32.0) |
|                    | Moderate problems | 19 (22.4) | 14 (16.5) | 15 (20.0) | 14 (18.7) |
|                    | Severe problems   | 10 (11.8) | 7 (8.2)   | 5 (6.7)   | 2 (2.7)   |
|                    | Extreme problems  | 2 (2.4)   | 0 (0.0)   | 0 (0.0)   | 0 (0.0)   |
|                    | Unknown           | 0 (0.0)   | 0 (0.0)   | 0 (0.0)   | 0 (0.0)   |
| Pain/discomfort    | No problems       | 3 (3.5)   | 8 (9.4)   | 2 (2.7)   | 5 (6.7)   |
|                    | Slight problems   | 27 (31.8) | 41 (48.2) | 30 (40.0) | 33 (44.0) |
|                    | Moderate problems | 34 (40.0) | 26 (30.6) | 34 (45.3) | 22 (29.3) |
|                    | Severe problems   | 20 (23.5) | 8 (9.4)   | 8 (10.7)  | 14 (18.7) |
|                    | Extreme problems  | 1 (1.2)   | 2 (2.4)   | 1 (1.3)   | 1 (1.3)   |
|                    | Unknown           | 0 (0.0)   | 0 (0.0)   | 0 (0.0)   | 0 (0.0)   |
| Anxiety/depression | No problems       | 53 (62.4) | 60 (70.6) | 47 (62.7) | 46 (61.3) |
|                    | Slight problems   | 23 (27.1) | 19 (22.4) | 23 (30.7) | 19 (25.3) |
|                    | Moderate problems | 8 (9.4)   | 3 (3.5)   | 3 (4.0)   | 7 (9.3)   |
|                    | Severe problems   | 1 (1.2)   | 3 (3.5)   | 2 (2.7)   | 0 (0.0)   |
|                    | Extreme problems  | 0 (0.0)   | 0 (0.0)   | 0 (0.0)   | 3 (4.0)   |

Unknown

0 (0.0)

0 (0.0)

0 (0.0)

0 (0.0)

---

Data are *n* (%).

*EQ-5D-5L* EuroQol five-dimensional descriptive system, *MITT* modified intention-to-treat, *NSAIDs* non-steroidal anti-inflammatory drugs

**Table S5.** Change in EQ-5D-5L score from baseline to Week 12 among patients who were compliant with the package insert (mITT population)

|                                        | Compliant                                  |                                |                               |                               |
|----------------------------------------|--------------------------------------------|--------------------------------|-------------------------------|-------------------------------|
|                                        | Mirogabalin and NSAIDs<br>( <i>n</i> = 74) |                                | NSAIDs<br>( <i>n</i> = 72)    |                               |
|                                        | Baseline                                   | Week 12                        | Baseline                      | Week 12                       |
| EQ-5D-5L score <sup>a</sup>            |                                            |                                |                               |                               |
| Mean ± SD                              | 0.6558 ±<br>0.1600                         | 0.7260 ±<br>0.1589             | 0.7034 ±<br>0.1557            | 0.7268 ±<br>0.1674            |
| Median (Q1, Q3)                        | 0.6848<br>(0.5571,<br>0.7600)              | 0.7596<br>(0.6361,<br>0.8307)  | 0.7341<br>(0.5929,<br>0.8228) | 0.7575<br>(0.6455,<br>0.8460) |
| Min, Max                               | 0.269,<br>1.000                            | 0.209,<br>1.000                | 0.245,<br>1.000               | 0.208,<br>1.000               |
| Change from baseline <sup>a</sup>      |                                            |                                |                               |                               |
| Mean ± SD                              | -                                          | 0.0701 ±<br>0.1599             | -                             | 0.0235 ±<br>0.1515            |
| Mean difference<br>(95% CI) vs NSAIDs  | -                                          | 0.0467<br>(-0.0043,<br>0.0977) | -                             | -                             |
| <i>P</i> -value vs NSAIDs <sup>b</sup> | -                                          | 0.0725                         | -                             | -                             |

<sup>a</sup>Complete Case Analyses were used; even data from patients missing the first visit were excluded.

<sup>b</sup>*t*-test

*CI* confidence interval, *EQ-5D-5L* EuroQol five-dimensional descriptive system, *mITT* modified intention-to-treat, *NSAIDs* non-steroidal anti-inflammatory drugs, *Q* quartile, *SD* standard deviation

**Table S6.** PGIC at Week 12 among patients who were compliant with the package insert (mITT population)

|                                        | Compliant                                     |                            |
|----------------------------------------|-----------------------------------------------|----------------------------|
|                                        | Mirogabalin<br>and NSAIDs<br>( <i>n</i> = 73) | NSAIDs<br>( <i>n</i> = 71) |
| 1. Very much improved                  | 9 (12.3)                                      | 4 (5.6)                    |
| 2. Much improved                       | 25 (34.2)                                     | 19 (26.8)                  |
| 3. Minimally improved                  | 20 (27.4)                                     | 13 (18.3)                  |
| 4. No change                           | 13 (17.8)                                     | 25 (35.2)                  |
| 5. Minimally worse                     | 3 (4.1)                                       | 8 (11.3)                   |
| 6. Much worse                          | 3 (4.1)                                       | 2 (2.8)                    |
| 7. Very much worse                     | 0 (0.0)                                       | 0 (0.0)                    |
| PGIC (score ≤ 3)                       | 54 (74.0)                                     | 36 (50.7)                  |
| Difference                             | 23.3                                          | -                          |
| 95% CI                                 | 7.9, 38.6                                     | -                          |
| <i>P</i> -value vs NSAIDs <sup>a</sup> | 0.0039                                        | -                          |
| PGIC (score ≤ 2)                       | 34 (46.6)                                     | 23 (32.4)                  |
| Difference                             | 14.2                                          | -                          |
| 95% CI                                 | -1.6, 30.0                                    | -                          |
| <i>P</i> -value vs NSAIDs <sup>a</sup> | 0.0819                                        | -                          |

Data are *n* (%) unless otherwise indicated.

<sup>a</sup>Chi-square test.

*CI* confidence interval, *mITT* modified intention-to-treat, *NSAIDs* non-steroidal anti-inflammatory drugs, *PGIC* Patient Global Impression of Change

**Table S7.** TEAEs and ADRs occurring in  $\geq 2\%$  patients in subgroups according to compliance with the package insert (safety analysis set)

|                                     | Compliant                                     |                             |
|-------------------------------------|-----------------------------------------------|-----------------------------|
|                                     | Mirogabalin<br>and NSAIDs<br>( <i>n</i> = 82) | NSAIDs<br>( <i>n</i> = 102) |
| Overall TEAEs                       | 46 (56.1)                                     | 12 (11.8)                   |
| Somnolence                          | 22 (26.8)                                     | 0 (0.0)                     |
| Dizziness                           | 18 (22.0)                                     | 0 (0.0)                     |
| Edema peripheral                    | 6 (7.3)                                       | 0 (0.0)                     |
| Constipation                        | 2 (2.4)                                       | 0 (0.0)                     |
| Unpleasant sensation in the abdomen | 2 (2.4)                                       | 3 (2.9)                     |
| Nasopharyngitis                     | 2 (2.4)                                       | 1 (1.0)                     |
| Fall                                | 2 (2.4)                                       | 1 (1.0)                     |
| Serious TEAEs                       | 0 (0.0)                                       | 1 (1.0) <sup>a</sup>        |
| Discontinuations due to TEAEs       | 2 (2.4) <sup>b</sup>                          | 0 (0.0)                     |
| Overall ADRs                        | 42 (51.2)                                     | 2 (2.0)                     |
| Somnolence                          | 22 (26.8)                                     | 0 (0.0)                     |
| Dizziness                           | 18 (22.0)                                     | 0 (0.0)                     |
| Edema peripheral                    | 6 (7.3)                                       | 0 (0.0)                     |
| Constipation                        | 2 (2.4)                                       | 0 (0.0)                     |
| Fall                                | 2 (2.4)                                       | 0 (0.0)                     |
| Serious ADRs                        | 0 (0.0)                                       | 0 (0.0)                     |
| Discontinuations due to ADRs        | 2 (2.4) <sup>b</sup>                          | 0 (0.0)                     |

Data are *n* (%).

Coded using the MedDRA/J, version 24.1.

<sup>a</sup>This was an event of breast cancer.

<sup>b</sup>One patient discontinued due to the occurrence of more than one AE or ADR.

*ADR* adverse drug reaction, *MedDRA/J* Japanese Medical Dictionary for Regulatory Activities, *NSAIDs* non-steroidal anti-inflammatory drugs, *TEAE* treatment-emergent adverse event

**Table S8.** List of participating institutions and principal investigators

| <b>Name of institution</b>                            | <b>Name of the principal investigator at the study site</b> |
|-------------------------------------------------------|-------------------------------------------------------------|
| Fukushima Medical University Hospital                 | Takuya Nikaido <sup>a</sup>                                 |
| Kato Seikei Zaitaku Clinic                            | Yasuji Kato                                                 |
| Chiba University Hospital                             | Seiji Ohtori                                                |
| Tokyo Medical University Hospital                     | Kazuma Murata                                               |
| Tokyo Medical and Dental University Hospital          | Atsushi Okawa                                               |
| Sobajima Clinic                                       | Satoshi Sobajima                                            |
| Miyake Orthopedic Clinic                              | Nobumasa Miyake                                             |
| Hamamatsu University Hospital                         | Yukihiro Matsuyama                                          |
| Kurume University Hospital                            | Kimiaki Sato                                                |
| Jin Orthopaedic Clinic                                | Yasutomo Matsubayashi                                       |
| Kasaharaiin                                           | Takashi Kasahara                                            |
| Keio University Hospital                              | Osahiko Tsuji                                               |
| Kudanzaka Hospital                                    | Shigeo Shindo                                               |
| Yokohama City University Hospital                     | Yohei Ito                                                   |
| Funabashi Central Hospital                            | Masaomi Yamashita                                           |
| Tohoku Rosai Hospital                                 | Takashi Kusakabe                                            |
| Sendai Orthopaedic Hospital                           | Tetsuro Sato                                                |
| Tottori University Hospital                           | Shinji Tanishima                                            |
| Wakayama Medical University Hospital                  | Hiroshi Hashizume                                           |
| Osaka City University Hospital                        | Shinji Takahashi                                            |
| Saga University Hospital                              | Tadatsugu Morimoto                                          |
| Aichi Medical University Hospital                     | Shinsuke Inoue                                              |
| Kyoto University Hospital                             | Shunsuke Fujibayashi                                        |
| Tohoku Medical and Pharmaceutical University Hospital | Hiroshi Ozawa                                               |
| AR-Ex Spine Clinic                                    | Kiyoshi Yoshihara                                           |
| Osaka University Hospital                             | Takashi Kaito                                               |
| Saiseikai Kawaguchi General Hospital                  | Masaki Tomori                                               |

|                                   |                  |
|-----------------------------------|------------------|
| Tohoku University Hospital        | Toshimi Aizawa   |
| Yamaguchi Rosai Hospital          | Tsukasa Kanchiku |
| Fukuoka-Mirai Hospital            | Masayoshi Oga    |
| Jichi Medical University Hospital | Hirokazu Inoue   |
| Toyama University Hospital        | Taketoshi Yasuda |

<sup>a</sup>Study principal investigator.
